# Supplementary material for: Exploring the mode of binding of the bioflavonoid kaempferol with B and protonated forms of DNA using spectroscopic and molecular docking studies
Source: Royal Society of Chemistry journal article supplement (doi:10.1039/c4ra14553d), 2015-01-01
Supplement: c4ra14553d1.pdf [file c4ra14553d1.pdf]

## Supplementary Information

Exploring the mode of binding of the bioflavonoid kaempferol with B and protonated forms of DNA by spectroscopic and molecular docking study

Ankur Bikash Pradhan\*, Lucy Haque, Sutanwi Bhuiya and Suman Das\*

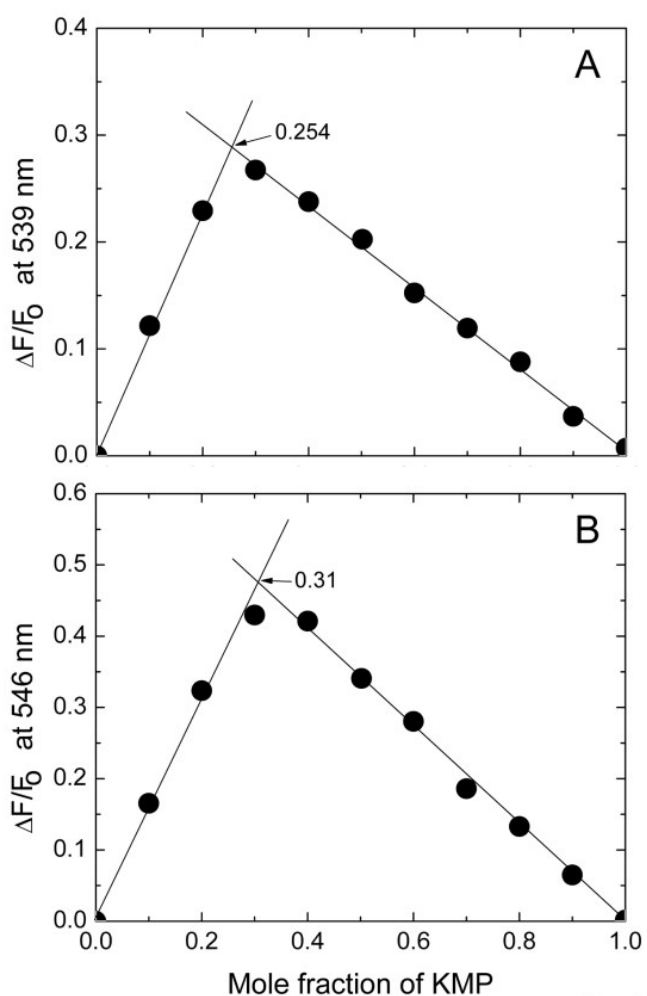

Fig. S1

**Fig. S1.** Job's plot for the binding of KMP to (A) B DNA in buffer-1 and (B) protonated DNA in buffer-2 at 25 °C and 10 °C respectively. The relative difference in fluorescence intensity at 539 nm for B DNA and at 546 nm for protonated DNA was plotted against the mole fraction fraction of KMP added.

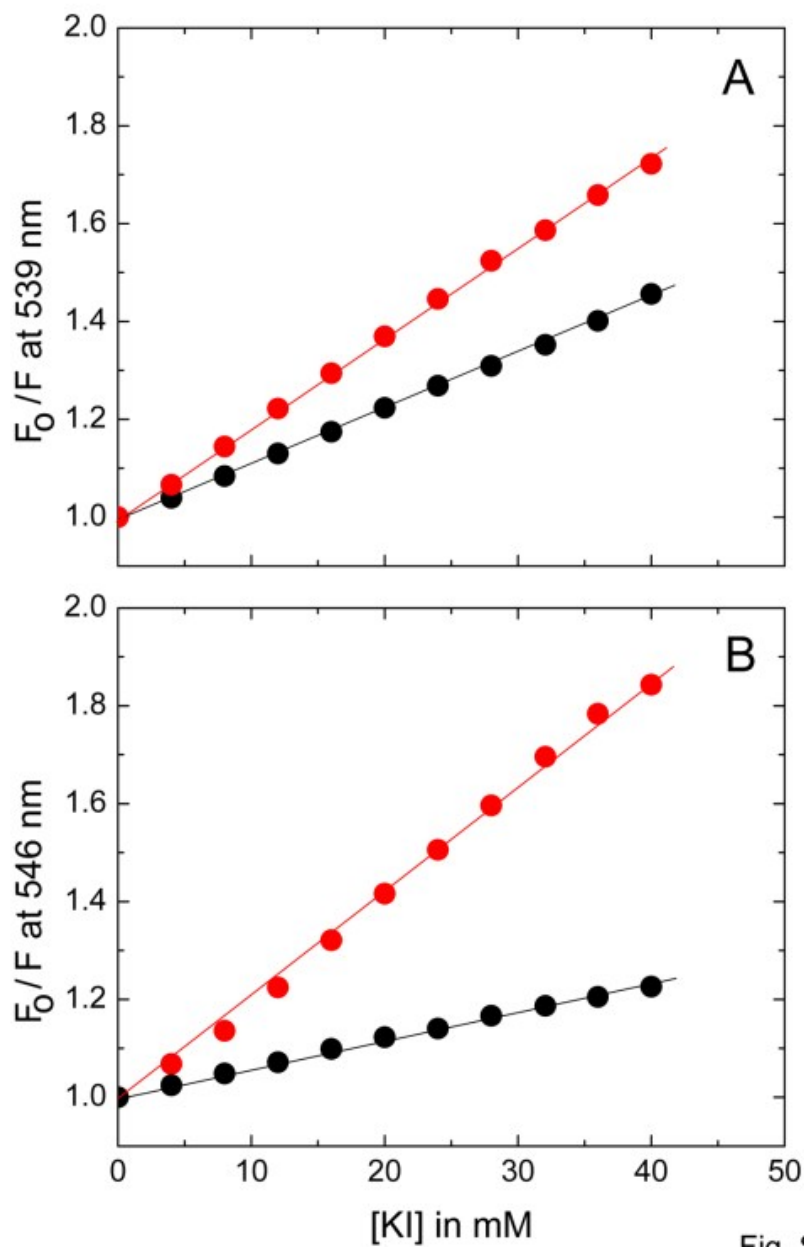

Fig. S2

**Fig. S2.** Stern-Volmer plots for the quenching of fluorescence of KMP by KI (A) in absence (●) and in presence (●) of B DNA in buffer-1 at 25 °C and (B) in absence (●) and in presence (●) of protonated DNA in buffer-2 at 10 °C.

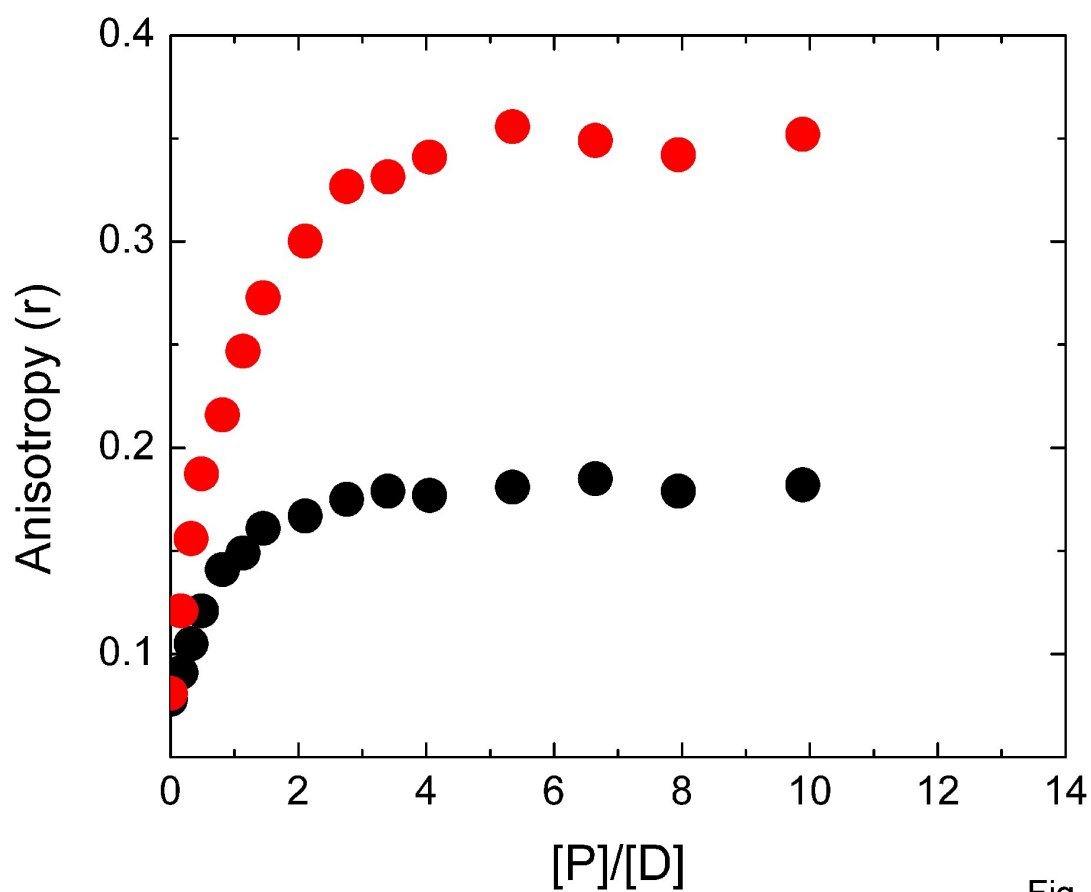

Fig. S3

**Fig. S3.** Variation of the anisotropy of KMP fluorescence as a function of concentration of B DNA (●) and protonated DNA (●).  $\lambda_{\text{ex}} = 373$  and  $363$  nm when KMP is treated with B DNA and protonated DNA respectively;  $\lambda_{\text{em}} = 539$  and  $546$  nm respectively for B DNA and protonated DNA.
